# Supplementary material for: Lack of AtMC1 catalytic activity triggers autoimmunity dependent on NLR stability
Source: Springer Nature journal article supplement (doi:10.1038/s44319-025-00426-4), 2025-03-20
Supplement: MOESM12 [file 44319_2025_426_MOESM12_ESM.pdf]

## Expanded View Figures

### Figure EV1. Absence of AtMC1 results in mild autoimmunity.

(A) Schematic representation of *atmc1* CRISPR mutants, depicting the locations of the two guide RNAs (gRNAs) targeting the AtMC1 gene. The location of the T-DNA insertion of the T-DNA *atmc1* mutant is indicated with an orange triangle. Below, Sanger sequencing chromatograms showing the site of deletion of *atmc1*-CR#1 and *atmc1*-CR#2. (B) Representative image of 40-day-old Wt, *atmc1* and *atmc1*-CR#1 plants grown under short day conditions. Scale bar = 5.5 cm. (C) Trypan blue staining of an area belonging to the 6th true leaf of the plants shown in (A). Scale bar = 0.5 mm. (D) Plant fresh weight of genotypes shown in (A) ( $n = 12$ ). Different letters indicate statistical difference in fresh weight between genotypes (one-way ANOVA followed by post hoc Tukey,  $p$  value < 0.05). In box plot, the centre line indicates the median, the bounds of the box show the 25th and 75th percentiles, the whiskers indicate minimum to maximum values. (E) Total protein extracts from the plant genotypes shown in (A) were run on an SDS-PAGE gel and immuno-blotted against anti-PR1a. Coomassie Blue Staining (CBS) of the immunoblotted membranes shows protein levels of Rubisco as a loading control. (F) Bacterial growth on the indicated genotypes 3 days post-infection with virulent *Pseudomonas syringae* DC3000 strain. Different letters indicate statistical difference (one-way ANOVA followed by post hoc Tukey,  $p$  value < 0.05) ( $n = 14$ ). In box plot, the centre line indicates the median, the bounds of the box show the 25th and 75th percentiles, the whiskers indicate minimum to maximum values. (G) Bacterial growth on the indicated genotypes 3 days post-infection with avirulent *Pseudomonas syringae* AvrRpt2 strain ( $n = 11$  biological replicates).  $P$ -value was calculated using a two-tailed unpaired Student's  $t$  test. In box plot, the centre line indicates the median, the bounds of the box show the 25th and 75th percentiles, the whiskers indicate minimum to maximum values.

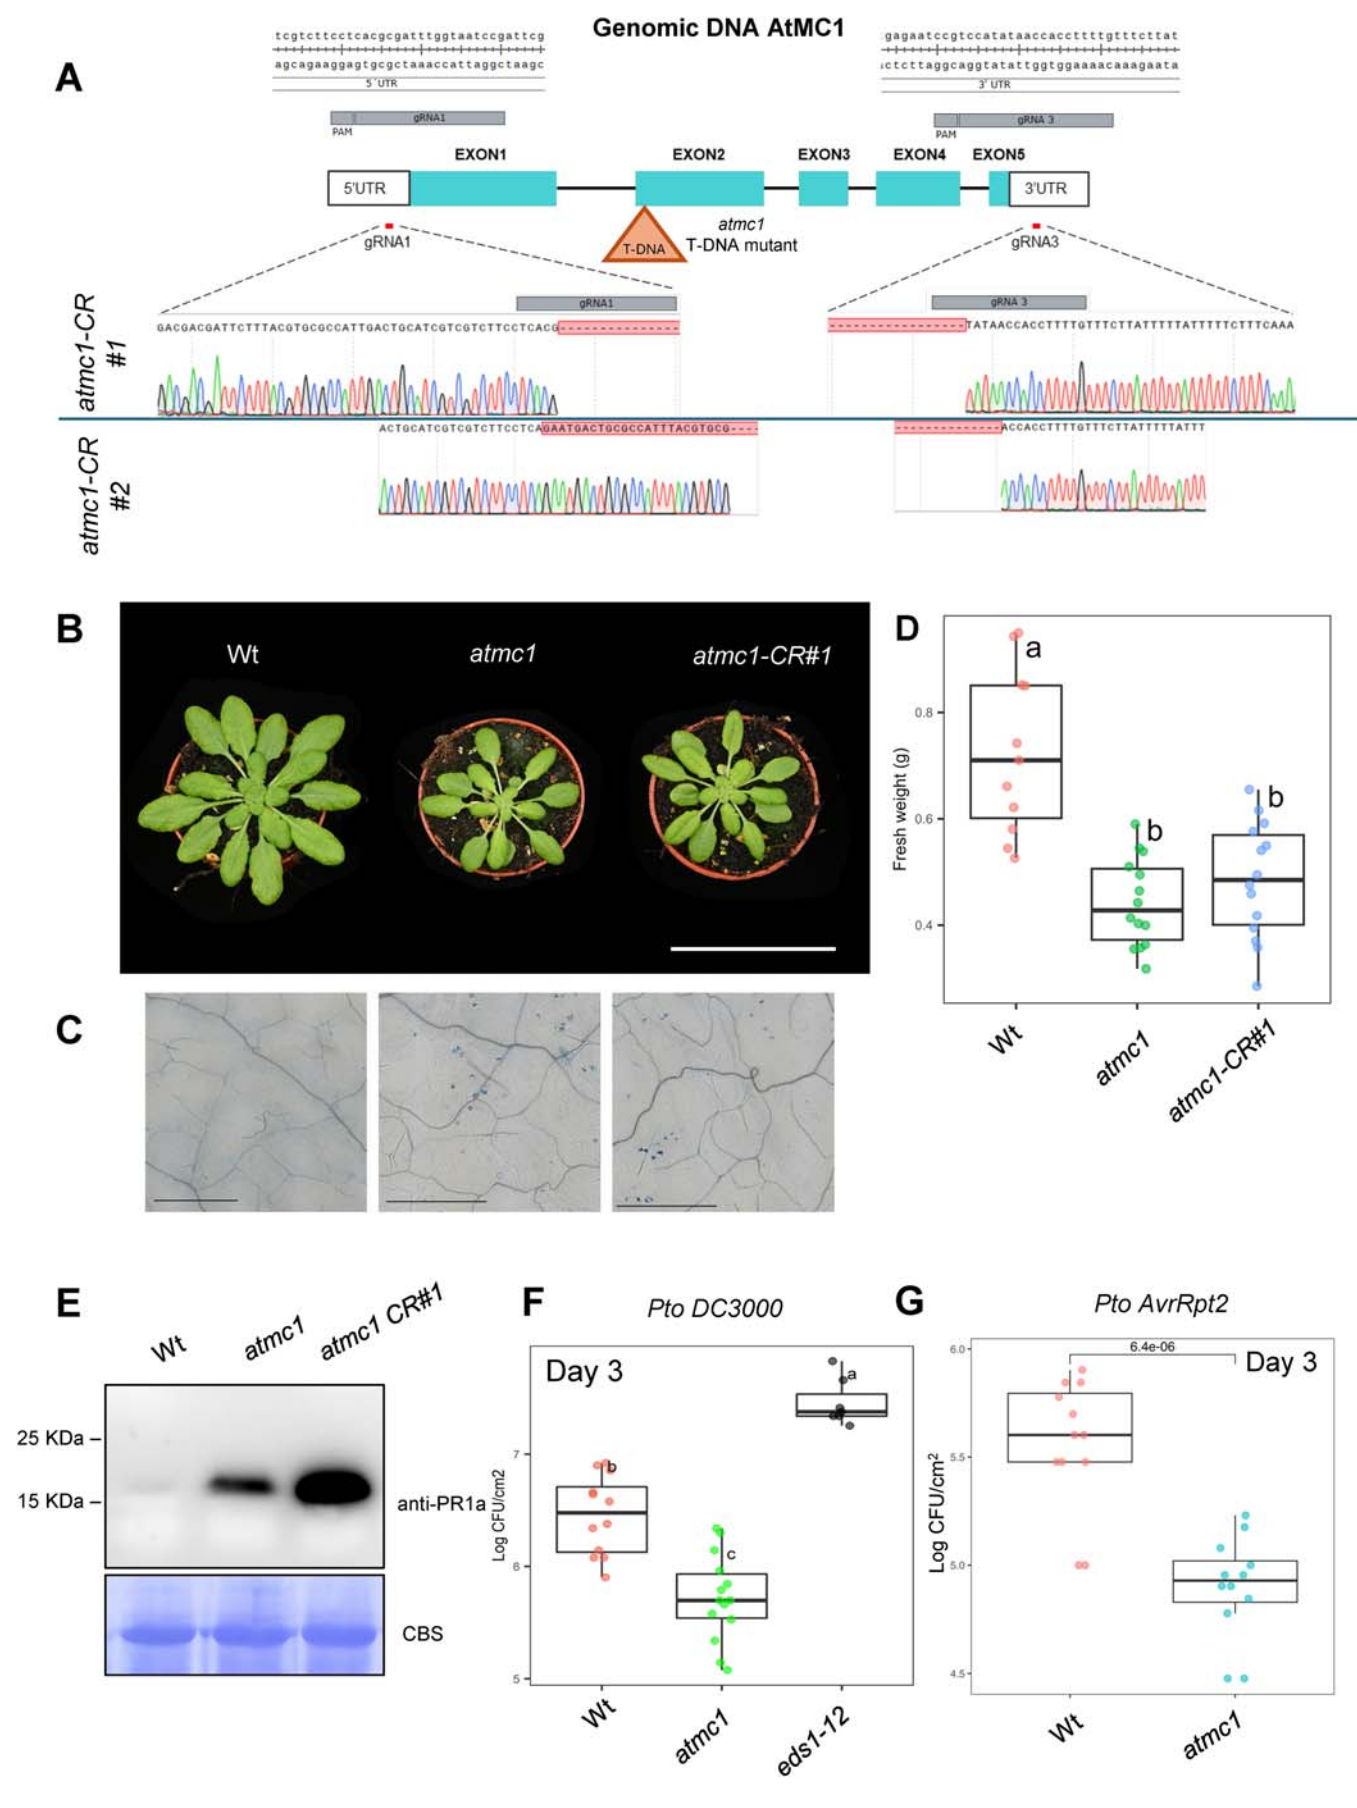

**A**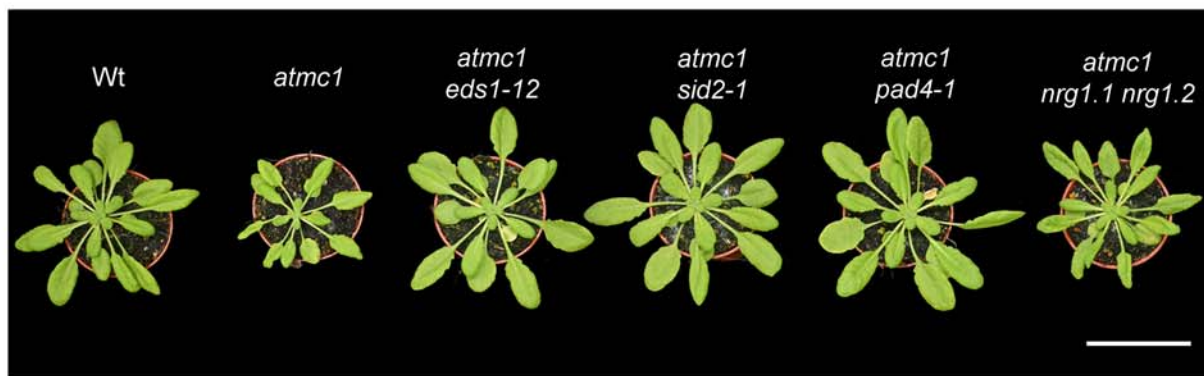**B**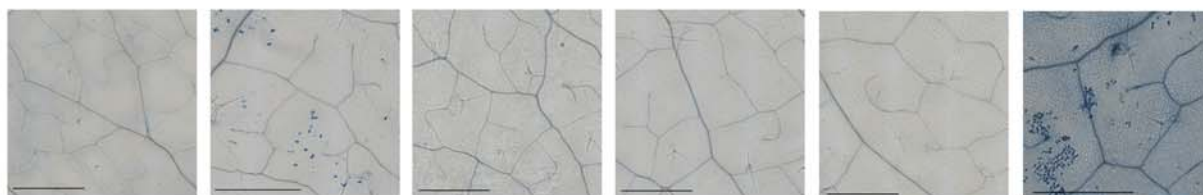**C**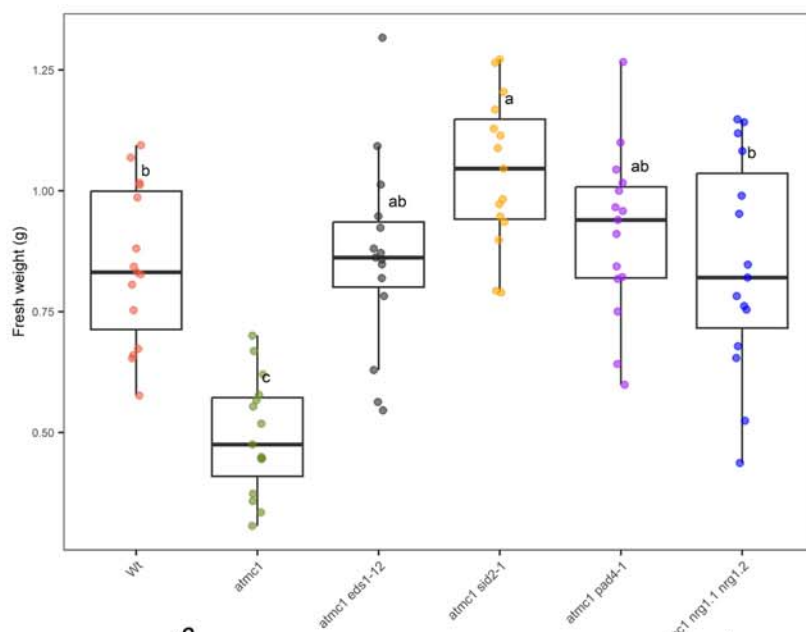**D**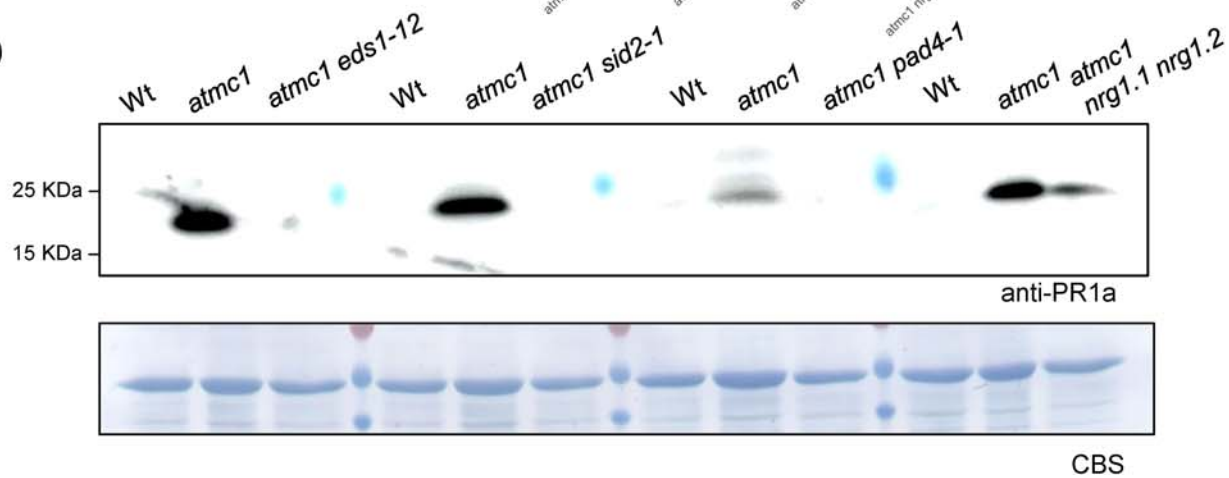

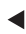

**Figure EV2. Constitutive immune activation in *atmc1* plants is dependent on SA synthesis and immune signalling through EDS1-PAD4.**

(A) Representative image of 40-day-old Wt, *atmc1*, *atmc1 eds1-12*, *atmc1 sid2-1*, *atmc1 pad4-1* and *atmc1 nrg1.1 nrg1.2* grown under short day conditions. Scale bar = 5.5 cm. (B) Trypan blue staining of an area belonging to the 6th true leaf of the plants shown in (A). Scale bar = 0.5 mm. (C) Plant fresh weight of genotypes shown in (A) ( $n = 15$ ). Different letters indicate statistical difference in fresh weight between genotypes (one-way ANOVA followed by post hoc Tukey,  $p$  value  $< 0.05$ ). In box plot, the centre line indicates the median, the bounds of the box show the 25th and 75th percentiles, the whiskers indicate minimum to maximum values. (D) Total protein extracts from the plant genotypes shown in (A) were run on an SDS-PAGE gel and immuno-blotted against anti-PR1a. Coomassie Blue Staining (CBS) of the immunoblotted membranes shows protein levels of Rubisco as loading control.

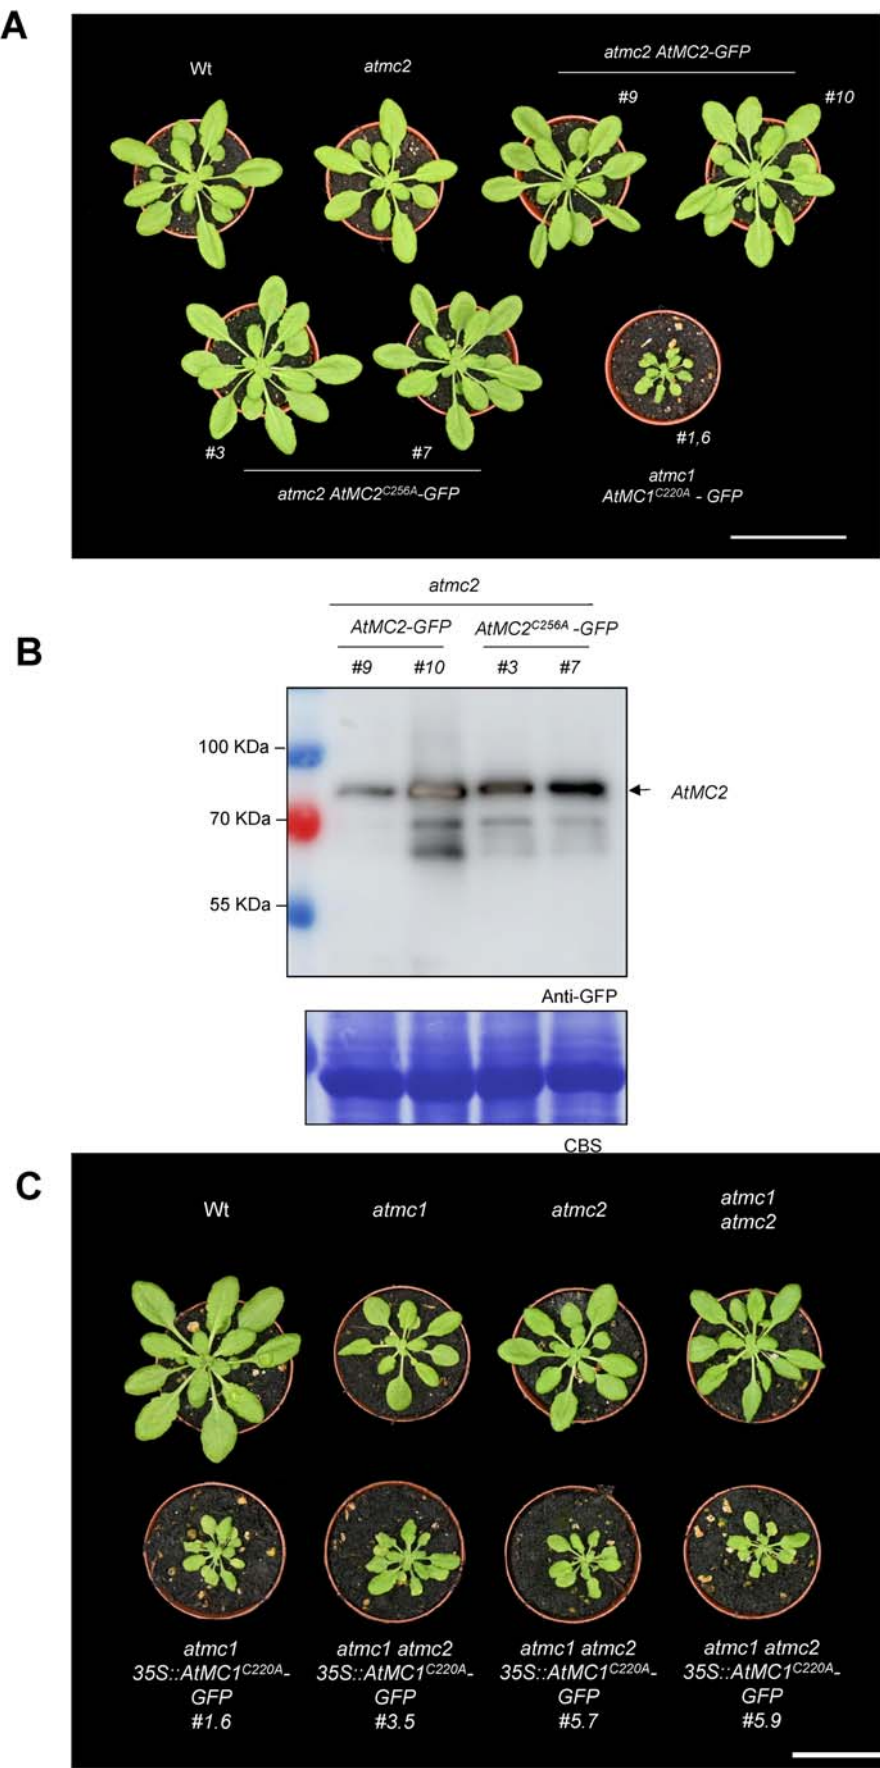

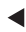

**Figure EV3. Overexpression of a catalytically inactive AtMC2 in an *atmc2* mutant background does not cause autoimmune phenotype.**

(A) Representative images of 40-day-old plants with the indicated genotypes grown under short day conditions. Two independent stable transgenic plants of the T<sub>2</sub> generation expressing either *AtMC2-GFP* (#9 and #10) or *AtMC2<sup>C256A</sup>-GFP* (#3 and #7) under the control of a 35S constitutive promoter in the *atmc2* mutant background are shown. Scale bar = 5.5 cm. (B) Total protein extracts from the plant genotypes shown in (A) were run on an SDS-PAGE gel and immuno-blotted against with the indicated antisera. Coomassie Blue Staining (CBS) of the immunoblotted membranes shows protein levels of Rubisco as a loading control. (C) Representative images of 40-day-old plants with the indicated genotypes grown under short day conditions. Three independent stable transgenic lines expressing *AtMC1<sup>C220A</sup>-GFP* under the control of a 35S constitutive promoter in the *atmc1 atmc2* mutant backgrounds are shown. Scale bar = 5.5 cm.

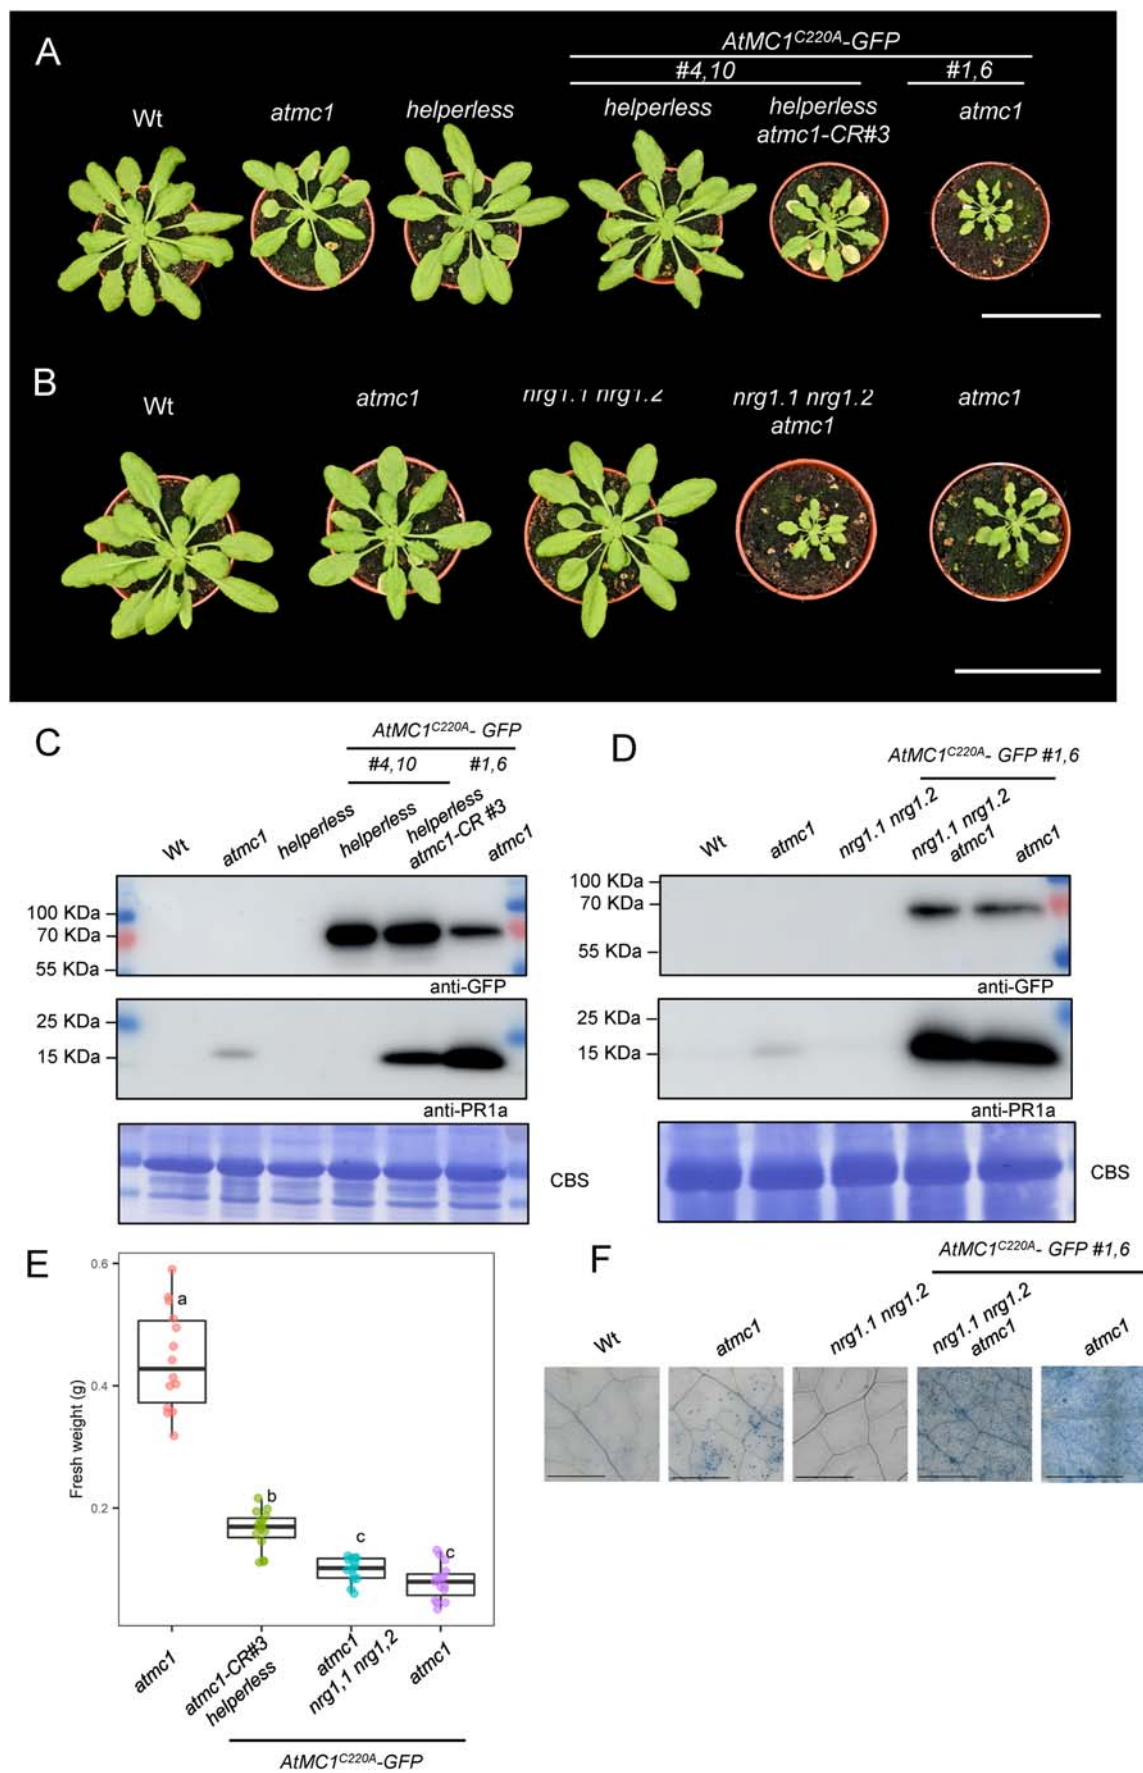

**Figure EV4. Autoimmunity caused by catalytically inactive AtMC1 is partially dependent on the hNLR family ADR1 but not NRG1.**

(A, B) Representative images of 40-day-old plants with the indicated genotypes grown under short day conditions. Scale bar = 5.5 cm. (C, D) Total protein extracts from the plant genotypes shown in (A, B) were run on an SDS-PAGE gel and immuno-blotted against the indicated antisera. Comassie Blue Staining (CBS) of the immunoblotted membranes shows protein levels of Rubisco as a loading control. (E) Plant fresh weight of the indicated genotypes ( $n = 12$ ). Different letters indicate statistical difference in fresh weight between genotypes (one-way ANOVA followed by post hoc Tukey,  $p$  value  $< 0.05$ ). In box plot, the centre line indicates the median, the bounds of the box show the 25th and 75th percentiles, the whiskers indicate minimum to maximum values. Quantification of fresh weight from Wt, *helperless*, *helperless/AtMC1<sup>C220A</sup>-GFP* and *nrg1.1 nrg1.2* were excluded from the fresh weight graph to better appreciate statistical differences between genotypes of interest. (F) Trypan blue staining of an area belonging to the 6th true leaf of the plants shown in (B). Scale bar = 0.5 mm.

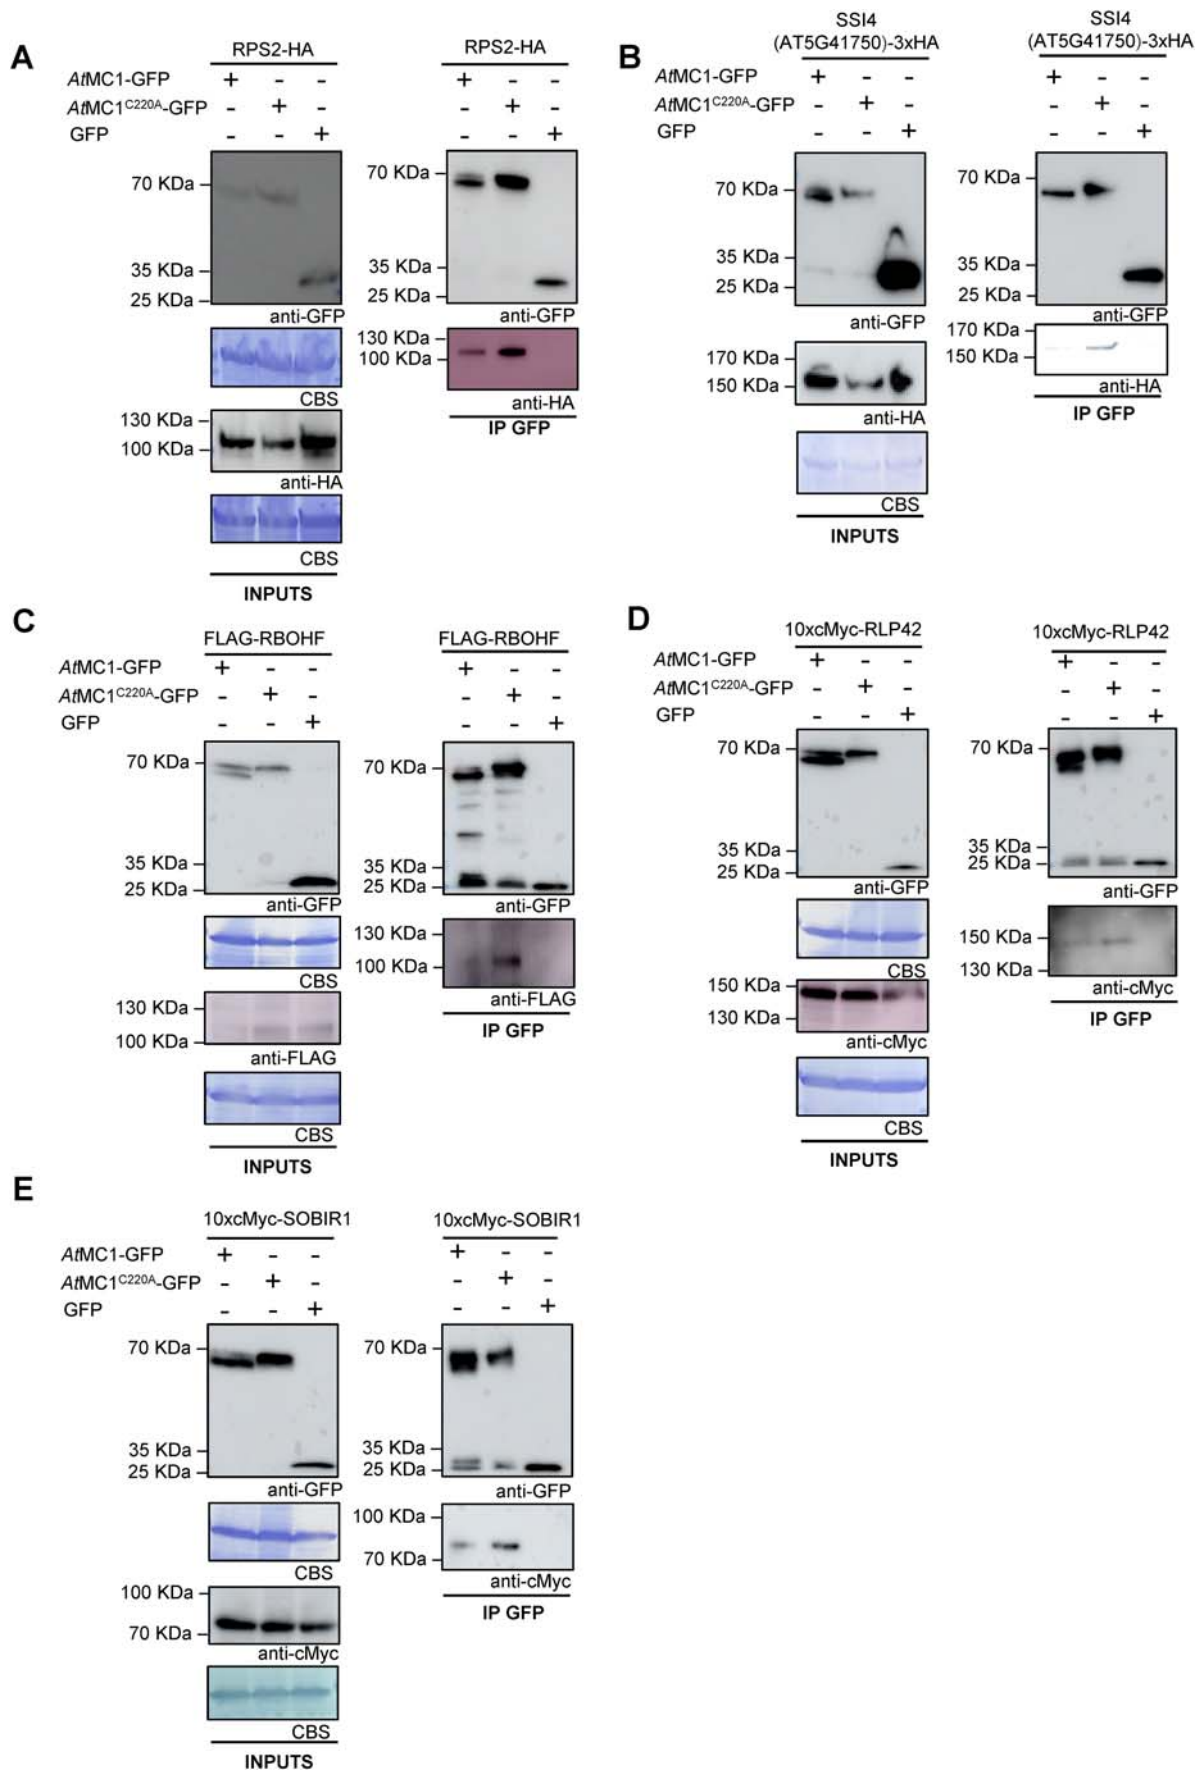

**Figure EV5. Catalytically inactive AtMC1 interacts in planta with NLRs, and immune components involved in PTI.**

(A–E) *AtMC1-GFP*, *AtMC1<sup>C220A</sup>-GFP* or free GFP were transiently co-expressed with either RPS2-HA (A), SS14-3xHA (B), FLAG-RBOHF (C), 10xcMyc-RLP42 (D) or 10xcMyc SOBIR1 (E) in *N. benthamiana*. 3 days post-infiltration (dpi) plant extracts co-expressing the indicated constructs were immunoprecipitated with anti-GFP magnetic beads (IP GFP). Protein inputs from protein extracts before IP (INPUTS) and eluates from IPs were run on an SDS-PAGE and immunoblotted against the indicated antisera. Coomassie Blue Staining (CBS) of the immunoblotted membranes shows protein levels of Rubisco as a loading control in the inputs.
